# Supplementary material for: Is a differentiated care model needed for patients with TB? A cohort analysis of risk factors contributing to unfavourable outcomes among TB patients in two states in South India
Source: Springer Nature journal article supplement (doi:10.1186/s12889-020-09257-5), 2020-07-24
Supplement: MOESM1 [file 18213492]

Risk Assessment and Needs Assessment  
 Nikshay Id \_\_\_\_\_ DMC Name: \_\_\_\_\_

Date: \_\_\_\_\_  
 TU Name: \_\_\_\_\_

Facility Name \_\_\_\_\_

PRAD Id: \_\_\_\_\_

|                         |  |                                                                                                              |  |
|-------------------------|--|--------------------------------------------------------------------------------------------------------------|--|
| Name:.....              |  | <b>Age:</b> .....Yrs <b>DOB:</b> DD/MM/YYYY                                                                  |  |
| Current Address.....    |  | <b>Gender:</b> <input type="checkbox"/> M <input type="checkbox"/> F <input type="checkbox"/> TG             |  |
| .....                   |  | <b>Religion:</b> <input type="checkbox"/> Hindu <input type="checkbox"/> Muslim                              |  |
| .....                   |  | <input type="checkbox"/> Christian <input type="checkbox"/> Other                                            |  |
| Land Mark:.....         |  | <b>Education:</b> <input type="checkbox"/> Cannot                                                            |  |
| permanent Address ..... |  | Read/Write <input type="checkbox"/> <5 std <input type="checkbox"/> 5-10 std. <input type="checkbox"/>       |  |
| .....                   |  | 12 <sup>th</sup> <input type="checkbox"/> Diploma <input type="checkbox"/> Graduate <input type="checkbox"/> |  |
| .....                   |  | Post Graduate                                                                                                |  |
| Contact No              |  | <b>Marital Status:</b> <input type="checkbox"/> Single <input type="checkbox"/> Married                      |  |
|                         |  | <input type="checkbox"/> Widowed <input type="checkbox"/> separated/divorced                                 |  |
| Alternate No            |  | <b>Occupation:</b> .....                                                                                     |  |
|                         |  |                                                                                                              |  |

**Type of TB:**  Pulmonary  Extra Pulmonary

**History of TB treatment:**  Never treated or treatment <1 month  Previously treated for TB

**Anti TB medication from:**  Private sector  Public sector

**Treatment Regimen Initiated:**  DS TB  DRTB

Date of treatment initiation: DD/MM/YYYY

**Risk assessment**

| Risk factor                                                                                                                                                                                                                                                                                                                                     | Assess if present (Y/N) | Action Taken (Y/N) | Details of Action taken |
|-------------------------------------------------------------------------------------------------------------------------------------------------------------------------------------------------------------------------------------------------------------------------------------------------------------------------------------------------|-------------------------|--------------------|-------------------------|
| <b>About TB</b>                                                                                                                                                                                                                                                                                                                                 |                         |                    |                         |
| <b>Does patient understand TB disease and/or treatment?</b><br><i>Do you know what disease you have? what did the health worker say to you?</i><br><i>How does TB spread? By air / Droplet</i><br><i>What is the common symptom of TB? Cough</i><br><i>What is the test for lung TB? Sputum test</i><br><i>Is TB Curable? Yes TB is curable</i> |                         |                    |                         |
| <b>Acceptance of TB disease and/or treatment</b><br><i>Does the patient accept that s/he has TB?</i><br><i>Is the patient ready to take treatment for long term (At least 6 months)?</i><br><i>Is the patient willing to take tablets and / or injection as prescribed?</i>                                                                     |                         |                    |                         |
| <b>About Person</b>                                                                                                                                                                                                                                                                                                                             |                         |                    |                         |
| Regular travel/ likely migration                                                                                                                                                                                                                                                                                                                |                         |                    |                         |
| Co-existing conditions (write codes)<br><i>a. HIV b. DM c. Silicosis d. Undernutrition e. Pregnancy f. Breast feeding G. Other Specify</i>                                                                                                                                                                                                      |                         |                    |                         |
| Alcoholism                                                                                                                                                                                                                                                                                                                                      |                         |                    |                         |
| Tobacco Addiction                                                                                                                                                                                                                                                                                                                               |                         |                    |                         |

**Risk Assessment and Needs Assessment**

Date: \_\_\_\_\_

|                                                                                            |  |  |  |
|--------------------------------------------------------------------------------------------|--|--|--|
| Have you ever experienced discrimination or denial of rights because of TB?                |  |  |  |
| <b>About family</b>                                                                        |  |  |  |
| Living Alone / No Care Giver                                                               |  |  |  |
| Do you have the support of family members?                                                 |  |  |  |
| Is there some body who knows about your TB status who can support you in treatment?        |  |  |  |
| Did you face any crisis recently in the family or any plan of social event in near future? |  |  |  |
| Financial difficulties                                                                     |  |  |  |
| <b>About treatment</b>                                                                     |  |  |  |
| Problem with access to drugs                                                               |  |  |  |
| Were you irregular to treatment previously?                                                |  |  |  |
| Symptoms persisting                                                                        |  |  |  |

**Social security needs Assessment**

| Social entitlements                           | Specify Details                      | Have this?<br>Y/N/NA | Need support for availing this? Y/N | If linked through program, date of linkage |
|-----------------------------------------------|--------------------------------------|----------------------|-------------------------------------|--------------------------------------------|
|                                               | Aadhar Card                          |                      |                                     |                                            |
|                                               | Bank Account                         |                      |                                     |                                            |
|                                               | Ration Card ( APL/ BPL)              |                      |                                     |                                            |
|                                               | DBT linkage                          |                      |                                     |                                            |
|                                               | Link to free TB medicines            |                      |                                     |                                            |
| Nutrition support                             | Anthyodaya                           |                      |                                     |                                            |
|                                               | ICDS                                 |                      |                                     |                                            |
|                                               | Others                               |                      |                                     |                                            |
| Livelihood support                            | Income generation activity           |                      |                                     |                                            |
|                                               | Pension schemes                      |                      |                                     |                                            |
| Health related schemes (Health Insurance etc) | Janani Suraksha Yojana (JSY)         |                      |                                     |                                            |
|                                               | Rashtriya Swasthya Bima Yojana(RSBY) |                      |                                     |                                            |
|                                               | Other state related health schemes   |                      |                                     |                                            |
|                                               | Other Health Insurance Schemes       |                      |                                     |                                            |
| Any other schemes                             |                                      |                      |                                     |                                            |

| Patients preferred mode of care and support                                                                                                                                    |                                                                                                                                                           |                                                                                                                                                                                |
|--------------------------------------------------------------------------------------------------------------------------------------------------------------------------------|-----------------------------------------------------------------------------------------------------------------------------------------------------------|--------------------------------------------------------------------------------------------------------------------------------------------------------------------------------|
| <input type="checkbox"/> In Person<br><input type="checkbox"/> THALI <input type="checkbox"/> RNTCP<br><input type="checkbox"/> JEET<br><input type="checkbox"/> Support Group | <input type="checkbox"/> TB Careline<br><input type="checkbox"/> Technology based support<br>(99 DOTS, Merm Etc).<br><input type="checkbox"/> Call centre | <input type="checkbox"/> Facility / provider Support<br><input type="checkbox"/> Self-monitored/ Family<br>supported only<br><input type="checkbox"/> Other (Specify)<br>..... |
| I .....agree to this option/s for follow up                                                                                                                                    |                                                                                                                                                           | Signature of the patient:                                                                                                                                                      |

Risk and Needs Assessment done by

Project:  THALI  JEET  RNTCP

Name: \_\_\_\_\_

Designation:

staff Id:.....
