# Supplementary material for: Is a differentiated care model needed for patients with TB? A cohort analysis of risk factors contributing to unfavourable outcomes among TB patients in two states in South India
Source: BMC Public Health. 2020 Jul 24;20:1158. doi: 10.1186/s12889-020-09257-5 (PMC7379762; doi:10.1186/s12889-020-09257-5)
Supplement: Supplementary file 2 — Additional file 2. Prevention Care and Support Card (PCS). [file 12889_2020_9257_MOESM2_ESM.pdf]

#### 4. Patient Follow Up Visit Details

[illegible]

### Follow up lab test

| Date of Follow up test | Type of test done. | Result |
|------------------------|--------------------|--------|
|                        |                    |        |
|                        |                    |        |
|                        |                    |        |

**Patient Treatment outcome** (after discussion with HCP)☐ Cured ☐ Treatment completed ☐ Not Evaluated ☐ Loss to follow up ☐ Failure ☐ Regimen Change ☐ Death

☐ Others (specify) ..... ☐ ORW unable to follow up (reason) .....

New PRAD ID if applicable..... Outcome declaration date DD/MM/YYYY

**5. Post Treatment Completion Follow Up** - *once in 6 months till 2 years after completion of treatment*

[illegible]
